# Supplementary material
Source: PubMed Central journal article supplement (PMC3714324)
Supplement: NIHMS454901-supplement-supplement_1.pdf [file NIHMS454901-supplement-supplement_1.pdf]

**Figure 4: Gene expression changes during MMF treatment between improvers and non-improvers.** 571 genes showed changes in expression during MMF treatment (FDR<10%). Patients that were classified as non-improvers show low levels expression of these genes, which either do not change expression or show increased expression.

**Figure 5. Validation of biologically relevant microarray findings using quantitative reverse transcription polymerase chain reactions immunofluorescence.** Results are the relative expression values normalized to the mean expression in arm samples of control subjects, \* $p < 0.05$ .

**Supplementary Figure 1:** Study cohort recruitment.

Supplementary Figure 1: Study cohort recruitment

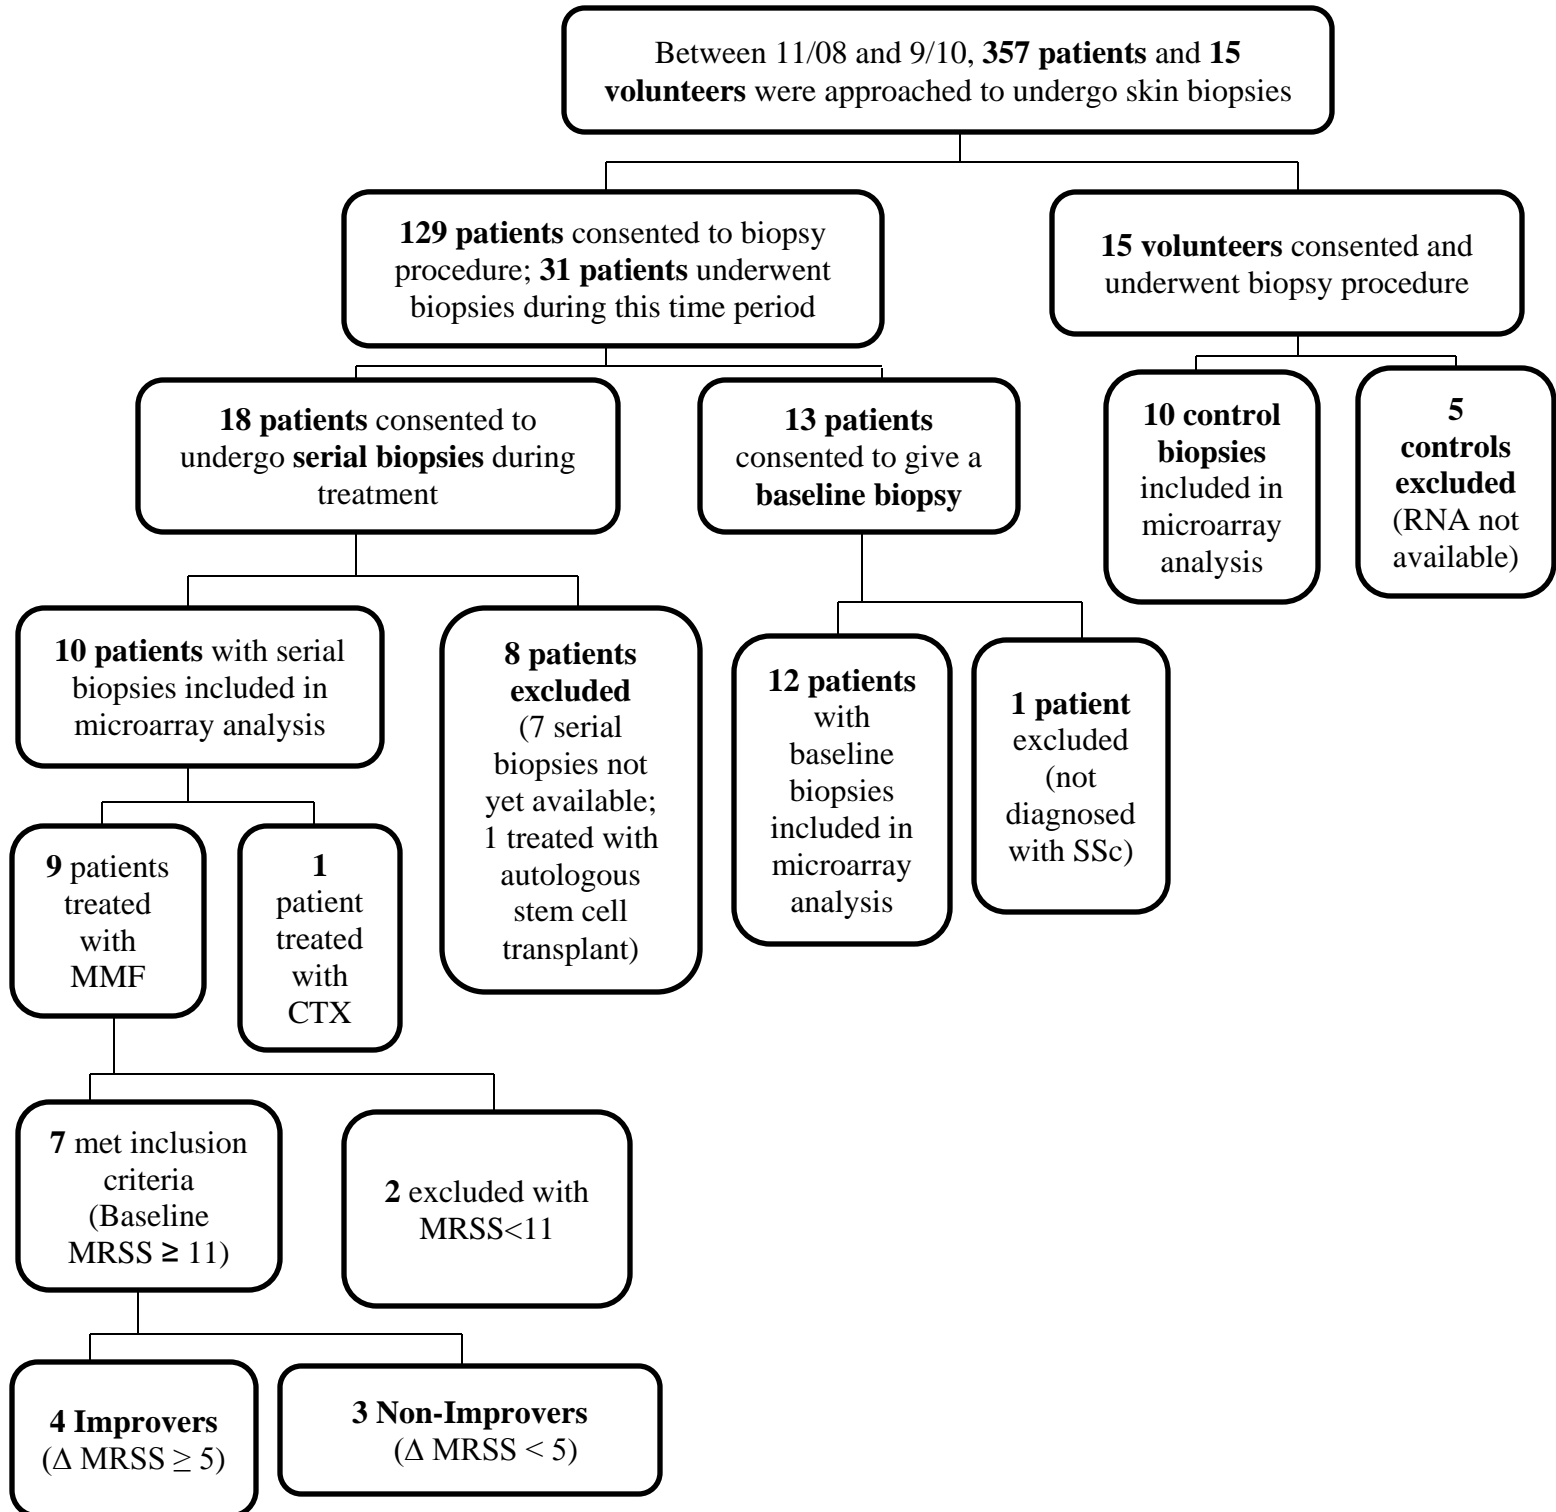

**Supplementary Table 1. Subjects and Biopsy Time Points**

| <b>Study Code</b> | <b>Time point</b> | <b>Age/Sex</b> | <b>Ethnicity</b>    | <b>Skin biopsy site</b> | <b>Disease duration</b> | <b>MRSS</b> | <b>Disease modifying therapies</b> |
|-------------------|-------------------|----------------|---------------------|-------------------------|-------------------------|-------------|------------------------------------|
| Norm01            | Baseline          | 37/F           | Caucasian           | Left arm, Left back     |                         |             |                                    |
| Norm02            | Baseline          | 57/F           | Caucasian           | Left arm, Right back    |                         |             |                                    |
| Norm03            | Baseline          | 33/F           | Asian               | Right Arm, Right back   |                         |             |                                    |
| Norm04            | Baseline          | 37/F           | Caucasian           | Right Arm, Right back   |                         |             |                                    |
| Norm05            | Baseline          | 37/F           | Asian               | Left arm, Left back     |                         |             |                                    |
| Norm06            | Baseline          | 32/F           | Caucasian           | Left arm, Left back     |                         |             |                                    |
| Norm07            | Baseline          | 63/M           | Caucasian           | Left arm, Left back     |                         |             |                                    |
| Norm08            | Baseline          | 37/M           | Caucasian           | Left arm, Left back     |                         |             |                                    |
| Norm09            | Baseline          | 30/F           | Caucasian/<br>Asian | Right arm, Right back   |                         |             |                                    |
| Norm10            | Baseline          | 33/M           | Asian               | Left arm                |                         |             |                                    |
| SSc02             | Baseline          | 46/F           | Caucasian           | Left arm, Left back     | 52                      | 35          | No treatment                       |
| SSc03             | Baseline          | 48/F           | Asian               | Left arm, Left back     | 8                       | 21          | No treatment                       |
|                   | 6 month           | 49/F           |                     | Left arm, Left back     | 14                      | 21          | MMF                                |
|                   | 12 month          | 49/F           |                     | Left arm, Left back     | 20                      | 8           | MMF                                |
| SSc04             | Baseline          | 45/F           | Caucasian           | Left arm, Left back     | 3                       | 9           | No treatment                       |
|                   | 6 month           | 45/F           |                     | Left arm, Left back     | 9                       | 3           | MMF                                |
|                   | 12 month          | 46/F           |                     | Left arm, Left back     | 16                      | 3           | No treatment                       |
| SSc05             | Baseline          | 40/F           | Hispanic            | Right arm, Right back   | 22                      | 32          | Minocycline                        |
|                   | 6 month           | 41/F           |                     | Right arm, Right back   | 28                      | 21          | MMF,<br>Minocycline,               |
| SSc06             | Baseline          | 54/F           | Caucasian           | Right arm, Right back   | 16                      | 16          | No treatment                       |
|                   | 6 month           | 55/F           |                     | Right arm, Right back   | 22                      | 11          | MMF                                |
|                   | 12 month          | 55/F           |                     | Right arm, Right back   | 28                      | 11          | MMF                                |
| SSc07             | Baseline          | 60/F           | Caucasian           | Left arm, Left back     | 112                     | 4           | No treatment                       |
|                   | 6 month           | 60/F           |                     | Left arm, Left back     | 119                     | 4           | MMF                                |

|            |          |      |           |                      |     |    |              |
|------------|----------|------|-----------|----------------------|-----|----|--------------|
|            | 12 month | 61/F |           | Left arm, Left back  | 125 | 3  | MMF          |
| SSc08      | Baseline | 65/F | Caucasian | Left arm, Left back  | 5   | 12 | No treatment |
|            | 6 month  | 66/F |           | Left arm, Left back  | 14  | 9  | MMF          |
| SSc10      | Baseline | 52/F | Caucasian | Left arm, Left back  | 12  | 13 | No Treatment |
|            | 6 month  | 53/F |           | Left arm, Left back  | 18  | 13 | MMF          |
|            | 12 month | 53/F |           | Left arm, Left back  | 24  | 7  | MMF          |
| SSc12      | Baseline | 51/F | Black     | Left arm, Right back | 11  | 14 | No treatment |
|            | 6 month  | 52/F |           | Left arm, Right back | 18  | 17 | MMF          |
| SSc14      | Baseline | 35/F | Caucasian | Left arm, Left back  | 15  | 10 | No treatment |
|            | 6 month  | 36/F |           | Left arm, Left back  | 21  | 16 | CTX          |
| SSc16      | Baseline | 51/F | Caucasian | Left arm, Left back  | 122 | 14 | No treatment |
|            | 6 month  | 51/F |           | Left arm, Left back  | 128 | 20 | MMF          |
| SScReg1002 | Baseline | 34/F | Black     | Left arm             | 26  | 32 | No treatment |
| SScReg1004 | Baseline | 27/F | Hispanic  | Left arm             | 111 | 26 | No treatment |
| SScReg1066 | Baseline | 21/M | Black     | Left arm             | 22  | 15 | MTX          |
| SScReg1067 | Baseline | 56/F | Caucasian | Left arm             | 37  | 34 | MMF          |
| SScReg1080 | Baseline | 55/F | Caucasian | Left arm             | 8   | 19 | No treatment |
| SScReg1096 | Baseline | 26/F | Hispanic  | Left arm             | 151 | 5  | No treatment |
| SScReg1103 | Baseline | 54/F | Caucasian | Left arm             | 144 | 13 | No treatment |
| SScReg1156 | Baseline | 48/F | Caucasian | Left arm             | 8   | 20 | MMF          |
| SScReg1213 | Baseline | 30/F | Hispanic  | Left arm, Left back  | 51  | 4  | No treatment |
| SScReg1269 | Baseline | 50/F | Black     | Left arm             | 9   | 14 | No treatment |
| SScReg1001 | Baseline | 37/F | Caucasian | Left arm             | 15  | 16 | MTX          |

---

Norm=healthy control, SSc=systemic sclerosis, SScReg=patient enrolled in the Northwestern Scleroderma Program Patient Registry, M=male, F=female, MRSS=modified Rodnan skin score, MMF=mycophenolate mofetil, CTX=cyclophosphamide, MTX=methotrexate. Disease duration=months between biopsy date and onset of first non-Raynaud symptom.

**Supplementary Table 2.** qPCR Primers for Microarray Validation

---

|       |                                          |
|-------|------------------------------------------|
| CTGF  | Forward: 5'-AGCTGACCTGGAAGAGAACATTAAG-3' |
|       | Reverse: 5'-GATAGGCTTGGAGATTTTGGGAGTA-3' |
| IL-6  | Forward: 5'-AAATTCGGTACATCCTCGACGG-3'    |
|       | Reverse: 5'-GGAAGG TTCAGGTTGTTTTCTGC-3'  |
| TSP-1 | Forward: 5'-TGTTTGTGCAGGAAGACAGG-3'      |
|       | Reverse: 5'-TTGTCAAGGGTGAGGAGGAC-3'      |

---

qPCR was used to validate pre- and post-treatment microarray values.

**Supplementary Table 3.** Baseline Echo, PFT, and HRCT Characteristics for Subjects Newly Prescribed MMF.

|                                | Improvers during MMF<br>N = 4 or as indicated | Non-improvers during<br>MMF<br>N = 3 or as indicated |
|--------------------------------|-----------------------------------------------|------------------------------------------------------|
| <b>Echocardiography</b>        | Mean, SD or as indicated                      |                                                      |
| LVEF (%)                       | 62, 2                                         | 66, 3                                                |
| LV mass (g/m <sup>2</sup> )    | 80, 14 (N = 3)                                | 76, 13                                               |
| TAPSE (cm)                     | 2.6, 0.4                                      | 2.2, 0.7                                             |
| RV FAC                         | 0.47, 0.02                                    | 0.50, 0.02                                           |
| PASP (mm Hg)                   | 25, 4                                         | 35, 6 (N = 2)                                        |
| LV diastolic function, N (%)   |                                               |                                                      |
| Normal                         | 1 (33)                                        | 1 (25)                                               |
| Abnormal                       | 2 (67)                                        | 2 (50)                                               |
| Indeterminate                  | 0 (0)                                         | 1 (25)                                               |
| <b>Pulmonary Function Test</b> |                                               |                                                      |
| FVC % Predicted                | 88, 20                                        | 71, 6                                                |
| FEV1 % Predicted               | 92, 21                                        | 71, 12                                               |
| FEV1/FVC % Predicted           | 84, 5                                         | 80, 9                                                |
| TLC % Predicted                | 93, 12                                        | 79, 6                                                |
| DLCO % Predicted               | 75, 24                                        | 57, 4                                                |
| <b>HRCT Exam</b>               |                                               |                                                      |
| Total lung disease score       | 5.75, 0.96                                    | 11.33, 5.03 (N = 2)                                  |

Echo=2-dimensional echocardiography with tissue Doppler, PFT=pulmonary function test, HRCT=high-resolution computed tomography of the chest, MMF=mycophenolate mofetil, MRSS=modified Rodnan skin score, LVEF=left ventricular ejection fraction, LV=left ventricle, TAPSE=tricuspid annular plane systolic

---

excursion, RV FAC=right ventricular fractional area change, PASP=pulmonary artery systolic pressure, FVC=forced vital capacity, FEV1=forced expiratory volume in one second, TLC=total lung capacity, DLCO=diffusing capacity for carbon monoxide. Total lung disease score=5 lung lobes scored: 0=No disease, 1=0-5 (minimal disease but not normal), 2=5-25, 3=26-50, 4=51-75, 5=76-100% involvement.

**Supplementary Table 4.** Association Between Baseline Clinical Data and Improvement in Skin Score During Study Independent of Treatment.

|                                       | Clinical improvement<br>during study<br>N = 7 or as indicated | No clinical improvement<br>during study<br>N = 7 or as indicated |
|---------------------------------------|---------------------------------------------------------------|------------------------------------------------------------------|
|                                       | Mean, SD or as indicated                                      |                                                                  |
| Age                                   | 49, 5                                                         | 46, 16                                                           |
| Sex, N (%) female                     | 7 (100)                                                       | 6 (86)                                                           |
| Race, N (%) white                     | 5 (71)                                                        | 4 (57)                                                           |
| SSc subtype, N (%) diffuse            | 7 (100)                                                       | 7 (100)                                                          |
| MRSS                                  | 24, 9                                                         | 16, 5                                                            |
| Raynaud disease duration (mo)         | 19, 18                                                        | 62, 63                                                           |
| Disease duration (mo)                 | 22, 16                                                        | 60, 62                                                           |
| Follow-up duration (mo)               | 11, 4                                                         | 10, 4                                                            |
| <b>Primary ANA pattern, N (%)</b>     |                                                               |                                                                  |
| Homogenous                            | 0 (0)                                                         | 2 (29)                                                           |
| Speckled                              | 4 (57)                                                        | 3 (43)                                                           |
| Nucleolar                             | 3 (43)                                                        | 2 (29)                                                           |
| <b>SSc-specific antibodies, N (%)</b> |                                                               |                                                                  |
| Scl-70                                | 0 (0)                                                         | 2 (29)                                                           |
| RNA Polymerase III                    | 1 (14) (N = 2)                                                | 3 (43)                                                           |
| Treatment by intrinsic subset         |                                                               |                                                                  |
| <b>Inflammatory</b>                   | N = 7                                                         | N = 2                                                            |
| MMF-treated                           | 6 (1 concurrent<br>minocycline)                               | 1                                                                |



|                                         |                                 |                      |
|-----------------------------------------|---------------------------------|----------------------|
| MMF-ever treated (additional therapies) | 1 (CTX, MTX, IVIG) <sup>†</sup> | 0                    |
| <b>Normal-like</b>                      | N = 0                           | N = 1                |
| MMF-treated                             | 0                               | 1                    |
| MMF-ever treated                        | 0                               | 0                    |
| <b>Fibroproliferative</b>               | N = 0                           | N = 4                |
| MMF-treated                             | 0                               | 4 (1 concurrent MTX) |
| MMF-ever treated                        | 0                               | 0                    |
| <b>Echocardiography</b>                 |                                 |                      |
| LVEF (%)                                | 63, 3 (N = 6)                   | 63, 3                |
| LV mass (g/m <sup>2</sup> )             | 76, 12 (N = 5)                  | 80, 13               |
| TAPSE (cm)                              | 2.6, 0.4 (N = 6)                | 2.3, 0.5             |
| RV FAC                                  | 0.47, 0.02 (N = 6)              | 0.47, 0.05           |
| PASP (mmHg)**                           | 26, 4 (N = 5)                   | 34, 5 (N = 5)        |
| LV diastolic function (n, %)            |                                 |                      |
| Normal                                  | 2 (33) (N = 6)                  | 3 (43)               |
| Abnormal                                | 2 (33) (N = 6)                  | 3 (43)               |
| Indeterminate                           | 2 (33) (N = 6)                  | 1 (14)               |
| <b>Pulmonary Function Test</b>          |                                 |                      |
| FVC % Predicted                         | 83, 17                          | 71, 6                |
| FEV1 % Predicted                        | 86, 17                          | 72, 7                |
| FEV1/FVC % Predicted                    | 83, 9                           | 82, 10               |
| TLC % Predicted                         | 93, 11                          | 81, 10               |
| DLCO % Predicted                        | 66, 20                          | 59, 14               |
| <b>HRCT Exam</b>                        |                                 |                      |

|                          |            |             |
|--------------------------|------------|-------------|
| Total Lung Disease Score | 4.83, 2.48 | 10.86, 8.76 |
|--------------------------|------------|-------------|

---

MRSS = modified Rodnan skin score, Disease duration=months between biopsy date and first non-Raynaud symptom, centromere ANA pattern and anticentromere antibodies were not observed in study cohort, MMF-treated=MMF treatment at baseline biopsy and/or during follow-up, CTX=cyclophosphamide, MTX=methotrexate, IVIG=intravenous immunoglobulin, LVEF=left ventricular ejection fraction, LV=left ventricle, TAPSE=tricuspid annular plane systolic excursion, RV FAC=right ventricular fractional area change, PASP=pulmonary artery systolic pressure, FVC=forced vital capacity, FEV1=forced expiratory volume in one second, TLC=total lung capacity, DLCO=diffusing capacity for carbon monoxide. Total lung disease scoring for each of 5 lung lobes assessed: 0=No disease, 1=0-5 (minimal disease but not normal), 2=5-25, 3=26-50, 4=51-75, 5=76-100% involvement. \* P=0.02, \*\*P=0.03. †MMF was discontinued after one month secondary to side effects.

**Supplemental Table 5: Significant annotations for genes with high expression in improvers**

| <b>Term</b>                | <b>Count</b> | <b>%</b> | <b>P-value</b> | <b>Benjamini</b> |
|----------------------------|--------------|----------|----------------|------------------|
| lymph_normal               | 21           | 26.3     | 4.8E-05        | 0.004            |
| cartilage                  | 15           | 18.8     | 1.6E-04        | 0.028            |
| white blood cells_monocyte | 17           | 21.3     | 3.1E-04        | 0.035            |
| ovary_normal               | 25           | 31.3     | 2.9E-03        | 0.043            |
| skin tumor_disease         | 22           | 27.5     | 2.4E-03        | 0.045            |

**Supplemental Table 6: Significant annotations for genes with low expression in improvers**

| <b>Term</b>                                             | <b>Count</b> | <b>%</b> | <b>P-value</b> | <b>Benjamini</b> |
|---------------------------------------------------------|--------------|----------|----------------|------------------|
| retina_central retina                                   | 30           | 14.4     | 9.0E-05        | 0.010            |
| brain_Anaplastic Gradell Astrocytoma                    | 31           | 14.8     | 8.4E-05        | 0.014            |
| regulation of Ras protein signal transduction           | 12           | 5.7      | 1.5E-05        | 0.018            |
| brain_null                                              | 34           | 16.3     | 2.2E-04        | 0.019            |
| brain_astrocytoma grade II                              | 25           | 12.0     | 5.2E-04        | 0.036            |
| regulation of cell communication                        | 26           | 12.4     | 9.2E-05        | 0.036            |
| cerebellum_normal cerebellum                            | 32           | 15.3     | 7.1E-04        | 0.040            |
| brain_anaplastic astrocytoma grade III                  | 27           | 12.9     | 1.3E-03        | 0.044            |
| regulation of small GTPase mediated signal transduction | 12           | 5.7      | 7.9E-05        | 0.046            |

**Supplemental Table 7: Annotations for genes whose expression increased during MMF treatment in the improvers**

| <b>Term</b>                        | <b>Count</b> | <b>%</b> | <b>P-value</b> | <b>Benjamini</b> |
|------------------------------------|--------------|----------|----------------|------------------|
| protein binding                    | 186          | 51.0     | 3.4E-06        | 0.002            |
| extracellular matrix               | 21           | 5.8      | 1.4E-05        | 0.005            |
| proteinaceous extracellular matrix | 19           | 5.2      | 5.7E-05        | 0.009            |
| binding                            | 249          | 68.2     | 3.2E-04        | 0.081            |

**Supplemental Table 8: Annotations for genes whose expression decreased during MMF treatment in the improvers**

| <b>Term</b>                                  | <b>Count</b> | <b>%</b> | <b>P-value</b> | <b>Benjamini</b> |
|----------------------------------------------|--------------|----------|----------------|------------------|
| intracellular                                | 111          | 77.6     | 8.1E-09        | 1.6E-06          |
| intracellular part                           | 108          | 75.5     | 3.2E-08        | 3.1E-06          |
| organelle                                    | 92           | 64.3     | 1.4E-05        | 5.5E-04          |
| intracellular organelle                      | 92           | 64.3     | 1.3E-05        | 6.3E-04          |
| organelle fission                            | 12           | 8.4      | 2.8E-06        | 6.6E-04          |
| condensed chromosome, centromeric region     | 7            | 4.9      | 1.1E-05        | 6.9E-04          |
| M phase of mitotic cell cycle                | 12           | 8.4      | 2.3E-06        | 7.1E-04          |
| kinetochore                                  | 7            | 4.9      | 2.6E-05        | 8.4E-04          |
| mitotic cell cycle                           | 15           | 10.5     | 2.0E-06        | 9.4E-04          |
| chromosome, centromeric region               | 8            | 5.6      | 4.5E-05        | 1.2E-03          |
| condensed chromosome                         | 8            | 5.6      | 5.7E-05        | 1.4E-03          |
| condensed chromosome kinetochore             | 6            | 4.2      | 7.8E-05        | 1.7E-03          |
| nuclear division                             | 12           | 8.4      | 1.9E-06        | 1.8E-03          |
| mitosis                                      | 12           | 8.4      | 1.9E-06        | 1.8E-03          |
| membrane-bounded organelle                   | 82           | 57.3     | 1.4E-04        | 2.3E-03          |
| intracellular membrane-bounded organelle     | 82           | 57.3     | 1.3E-04        | 2.4E-03          |
| spindle                                      | 8            | 5.6      | 1.3E-04        | 2.5E-03          |
| M phase                                      | 13           | 9.1      | 1.7E-05        | 3.0E-03          |
| cytoplasm                                    | 76           | 53.1     | 2.8E-04        | 4.2E-03          |
| cell cycle phase                             | 14           | 9.8      | 3.5E-05        | 5.4E-03          |
| cell cycle process                           | 16           | 11.2     | 5.9E-05        | 7.8E-03          |
| intracellular organelle part                 | 50           | 35.0     | 5.7E-04        | 7.9E-03          |
| organelle part                               | 50           | 35.0     | 6.6E-04        | 8.5E-03          |
| macromolecular complex                       | 40           | 28.0     | 8.3E-04        | 1.0E-02          |
| NOD-like receptor signaling pathway          | 6            | 4.2      | 1.7E-04        | 1.1E-02          |
| nucleus                                      | 56           | 39.2     | 1.2E-03        | 1.4E-02          |
| cell                                         | 121          | 84.6     | 1.9E-03        | 1.9E-02          |
| cell part                                    | 121          | 84.6     | 1.9E-03        | 2.0E-02          |
| cytoplasmic part                             | 52           | 36.4     | 5.2E-03        | 4.9E-02          |
| cytosol                                      | 20           | 14.0     | 5.5E-03        | 4.9E-02          |
| intracellular non-membrane-bounded organelle | 32           | 22.4     | 5.8E-03        | 5.0E-02          |
| non-membrane-bounded organelle               | 32           | 22.4     | 5.8E-03        | 5.0E-02          |
